# Supplementary material
Source: Springer Nature journal article supplement (https://www.springermedizin.de/resource/supplementary/12936_2008_638_MOESM2_ESM.pdf/9547882)
Supplement: MOESM2 [file 9547882]

**BOX A**

**BOX B**

5' – GCCGGTCTCG **TAGTACAGTCGT** CAACTCGTACGACTTAACAACATGCCCGTCATGG **GTTCAAKCCCC** AAATAGACCG

*t-RNA related region*

TGCCGCCATACGTAGGACTGACTATCCTGCTATGGGGGAATCAATWAGTCACTGAAAGCCAAGCCACAAGTGGGT

*t-RNA unrelated region*

ACAGGCAGGCCTTGACCGACADCGGTTGTTGAGCCAAAG (AAG)<sub>n</sub> –3'

*'A'-tail*
